# Supplementary material for: 7-Dehydrocholesterol-derived oxysterols cause neurogenic defects in Smith-Lemli-Opitz syndrome
Source: eLife journal article supplement (doi:10.7554/elife.67141), 2022-09-16

mDhcr7  
KD

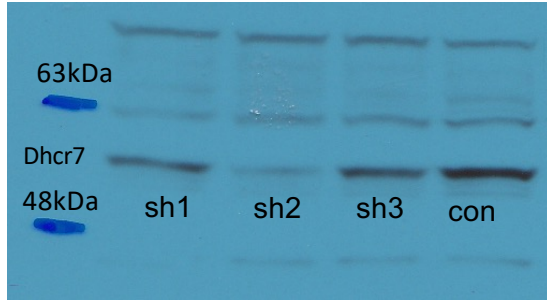

Erk1/2

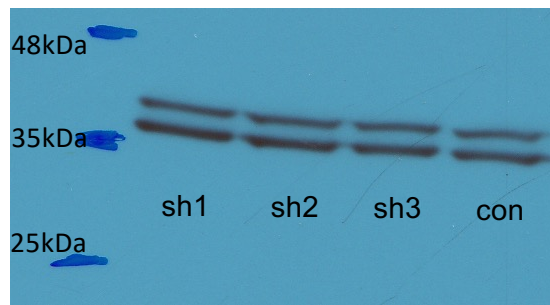

Supplement: supp [file elife-67141-supp-v1.zip]
