# Supplementary material for: 7-Dehydrocholesterol-derived oxysterols cause neurogenic defects in Smith-Lemli-Opitz syndrome
Source: eLife journal article supplement (doi:10.7554/elife.67141), 2022-09-16
Supplement: supp [file elife-67141-supp-v1.zip]

Archive with 25 entries (25 files):
- elife_poa_e67141_Figure_1_figure_supplement_1.jpg
- elife_poa_e67141_Figure_2_figure_supplement_1.jpg
- elife_poa_e67141_Figure_2_figure_supplement_2.jpg
- elife_poa_e67141_Figure_3_figure_supplement_1.jpg
- elife_poa_e67141_Figure_8_figure_supplement_1.jpg
- elife_poa_e67141_Figure_8_figure_supplement_2.jpg
- elife_poa_e67141_Figure_8_figure_supplement_3.jpg
- elife_poa_e67141_Transparent_Reporting_File.pdf
- elife_poa_e67141_Figure_1_source_data_1.pdf
- elife_poa_e67141_Figure_1_source_data_2.pdf
- elife_poa_e67141_Figure_3_source_data_1.pdf
- elife_poa_e67141_Figure_3_source_data_2.pdf
- elife_poa_e67141_Figure_5_source_data_1.pdf
- elife_poa_e67141_Figure_8_source_data_1.pdf
- elife_poa_e67141_Figure_8_source_data_2.pdf
- elife_poa_e67141_Figure_8_source_data_3.pdf
- elife_poa_e67141_Figure_8_source_data_4.pdf
- elife_poa_e67141_Figure_1_figure_supplement_1_source_data_1.pdf
- elife_poa_e67141_Figure_1_figure_supplement_1_source_data_2.pdf
- elife_poa_e67141_Supplementary_file_1.docx
- elife_poa_e67141_Supplementary_file_2.docx
- elife_poa_e67141_Supplementary_file_3.docx
- elife_poa_e67141_Supplementary_file_4.docx
- elife_poa_e67141_Supplementary_file_5.docx
- elife_poa_e67141_Supplementary_file_6.xlsx
