# Supplementary material for: 7-Dehydrocholesterol-derived oxysterols cause neurogenic defects in Smith-Lemli-Opitz syndrome
Source: eLife journal article supplement (doi:10.7554/elife.67141), 2022-09-16
Supplement: supp [file elife-67141-supp-v1.zip]

*Dhcr7*  
E15.5 CTX

+/+ -/-

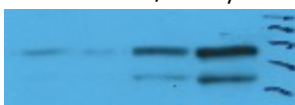

pTrkB

+/+ -/-

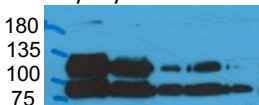

TrkB

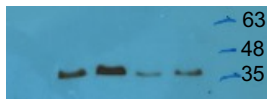

pMEK

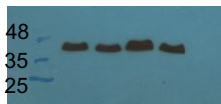

MEK

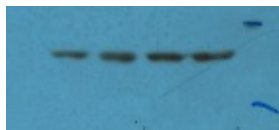

pC/EBP

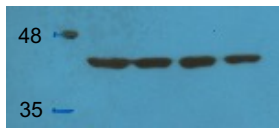

C/EBP

+/+ -/-

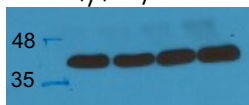

GAPDH
