# Supplementary material for: 7-Dehydrocholesterol-derived oxysterols cause neurogenic defects in Smith-Lemli-Opitz syndrome
Source: eLife journal article supplement (doi:10.7554/elife.67141), 2022-09-16

*Dhcr7*  
E15.5 CTX

---

+/+

+/+

-/-

pGR

135

100

75

GR

135

100

GAPDH

48

35

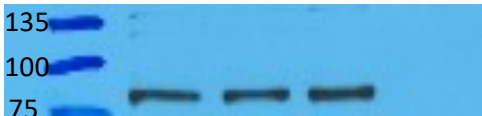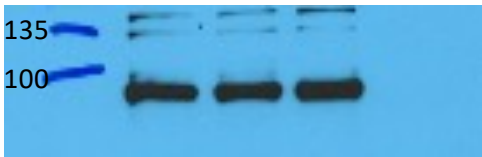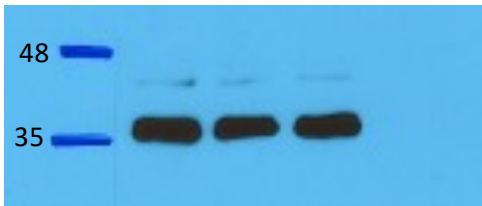

Supplement: supp [file elife-67141-supp-v1.zip]
