# Supplementary material for: 7-Dehydrocholesterol-derived oxysterols cause neurogenic defects in Smith-Lemli-Opitz syndrome
Source: eLife journal article supplement (doi:10.7554/elife.67141), 2022-09-16

Ectoderm  
Lineage

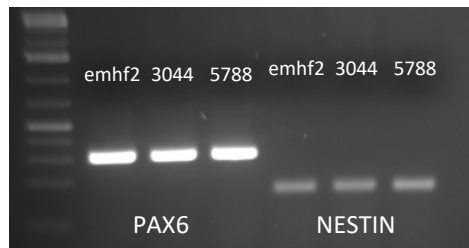

PAX6

NESTN

Ectoderm

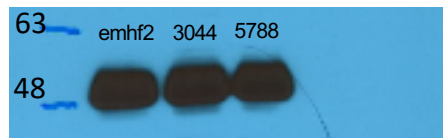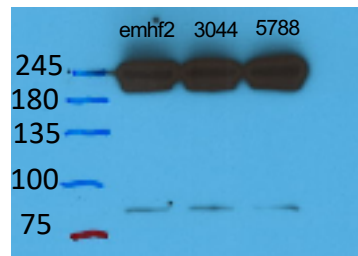

Mesoderm

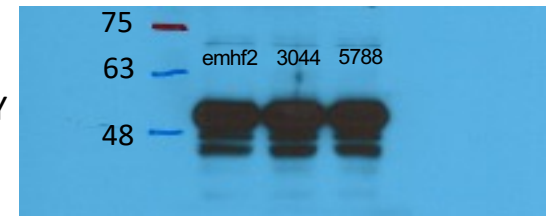

BRACHYURY

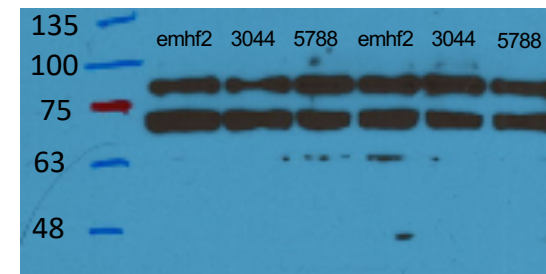

TBR2

Mesoderm  
Lineage

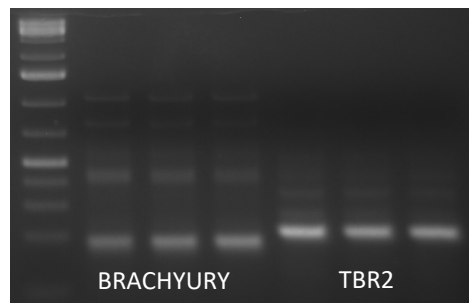

Endoderm

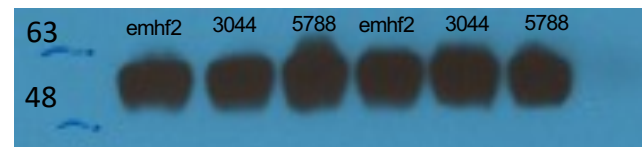

FOXA2

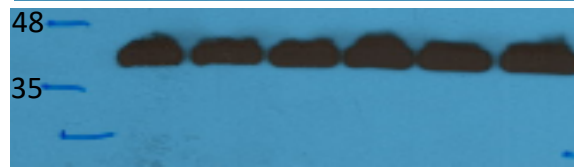

SOX17

Endoderm  
Lineage

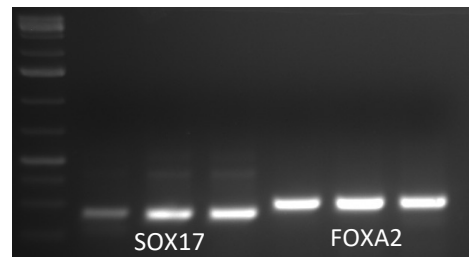

Supplement: supp [file elife-67141-supp-v1.zip › elife_poa_e67141_Figure_1_figure_supplement_1_source_data_2.pdf]
