# Supplementary material for: 7-Dehydrocholesterol-derived oxysterols cause neurogenic defects in Smith-Lemli-Opitz syndrome
Source: eLife journal article supplement (doi:10.7554/elife.67141), 2022-09-16
Supplement: supp [file elife-67141-supp-v1.zip › elife_poa_e67141_Supplementary_file_1.docx]

**Supplementary File 1. Retention times and MS/MS transitions for oxysterol internal standards. Relate to Figure 2 and Figure 2-Figure Supplement 2.**

| **Internal Standard** | **Retention**  **Time (min)** | **Q1** | **Q3** |
| --- | --- | --- | --- |
| d7-DHCEO | 1.80 | 424.3 | 406.3 |
| d7-7-ketocholesterol | 2.91 | 408.3 | 390.3 |
| d6-24,25-epoxycholesterol | 1.94 | 389.3 | 371.3 |
| d7-24-hydroxycholesterol | 1.63 | 392.3 | 374.3 |
| d7-4β-hydroxycholesterol | 5.16 | 392.3 | 374.3 |
