# Supplementary material for: 7-Dehydrocholesterol-derived oxysterols cause neurogenic defects in Smith-Lemli-Opitz syndrome
Source: eLife journal article supplement (doi:10.7554/elife.67141), 2022-09-16
Supplement: supp [file elife-67141-supp-v1.zip › elife_poa_e67141_Supplementary_file_3.docx]

**Supplementary File 3. Retention times and MS/MS transitions for sterol internal standards. Relate to Figure 2 and Figure 2-Figure Supplement 2.**

| **Internal Standard** | **Retention**  **Time (min)** | **Q1** | **Q3** |
| --- | --- | --- | --- |
| 13C3-desmosterol | 6.40 | 370.3 | 370.3 |
| d7-7-dehydrocholesterol | 6.90 | 374.3 | 374.3 |
| d7-cholesterol | 8.60 | 376.3 | 376.3 |
| 13C3-lanosterol | 9.83 | 412.3 | 412.3 |
