# Supplementary figures and images for: 7-Dehydrocholesterol-derived oxysterols cause neurogenic defects in Smith-Lemli-Opitz syndrome
Source: eLife journal article supplement (doi:10.7554/elife.67141), 2022-09-16

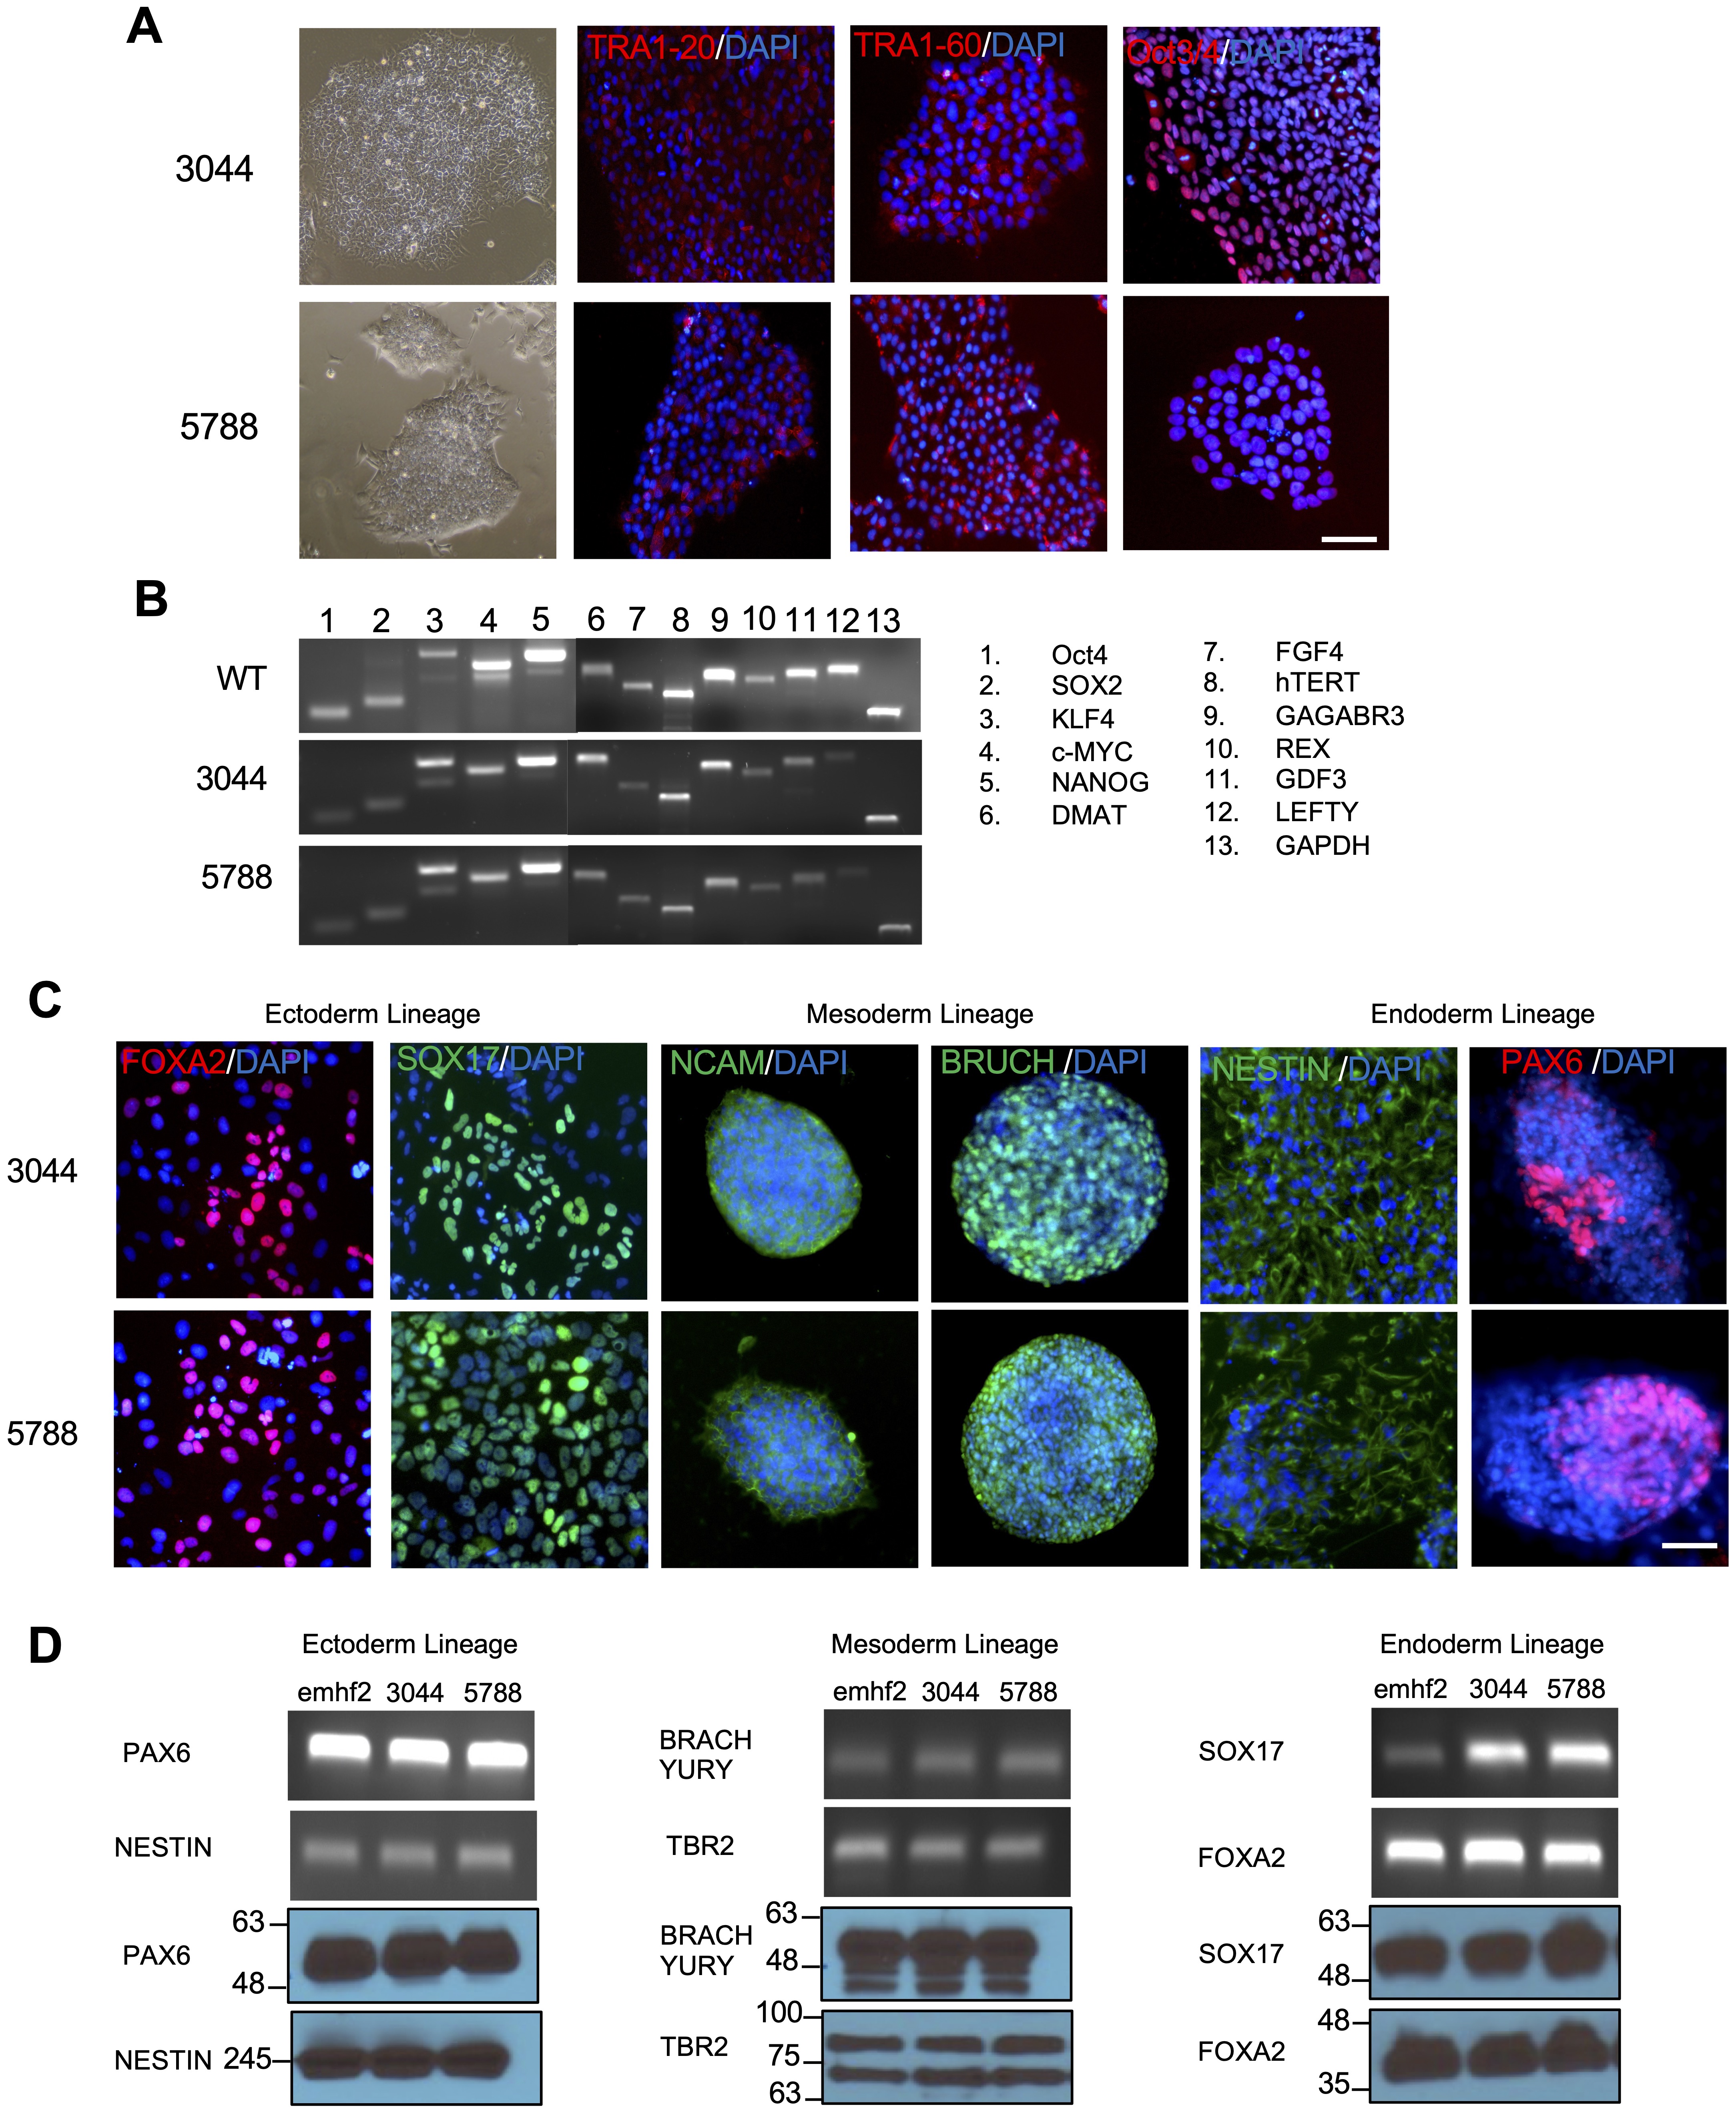

Supplement: supp [file elife-67141-supp-v1.zip › elife_poa_e67141_Figure_1_figure_supplement_1.jpg]

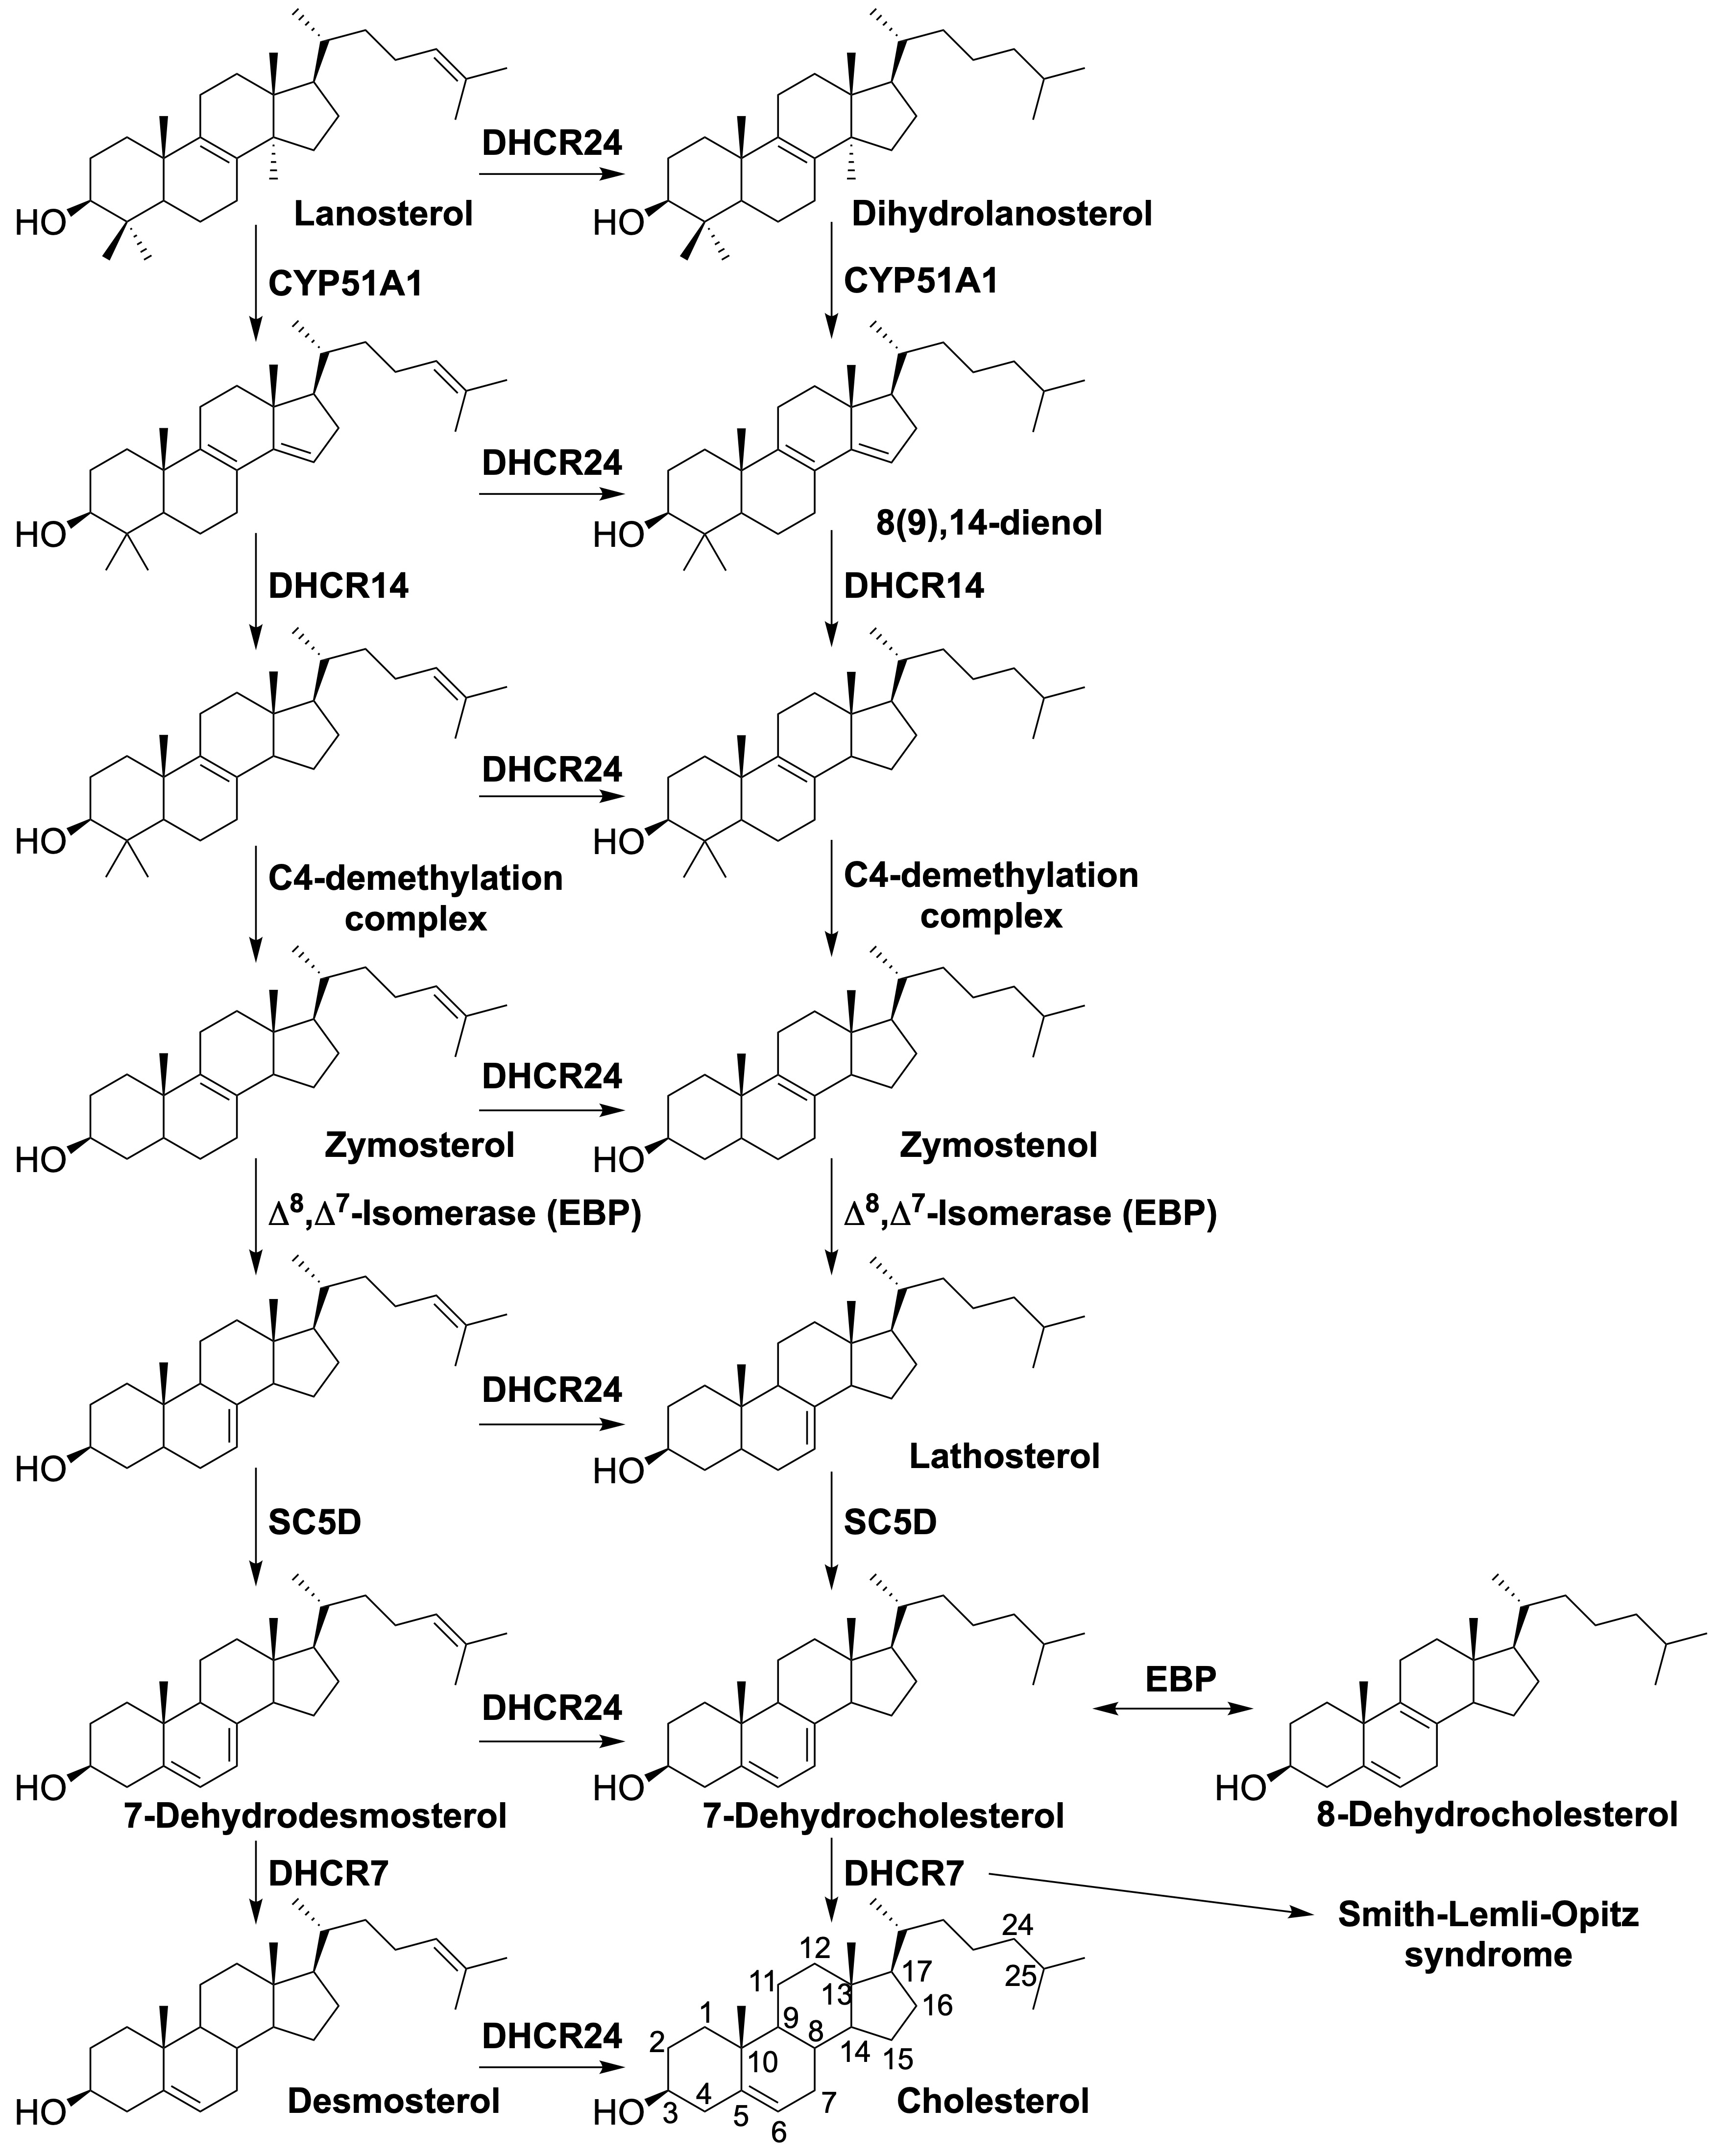

Supplement: supp [file elife-67141-supp-v1.zip › elife_poa_e67141_Figure_2_figure_supplement_1.jpg]

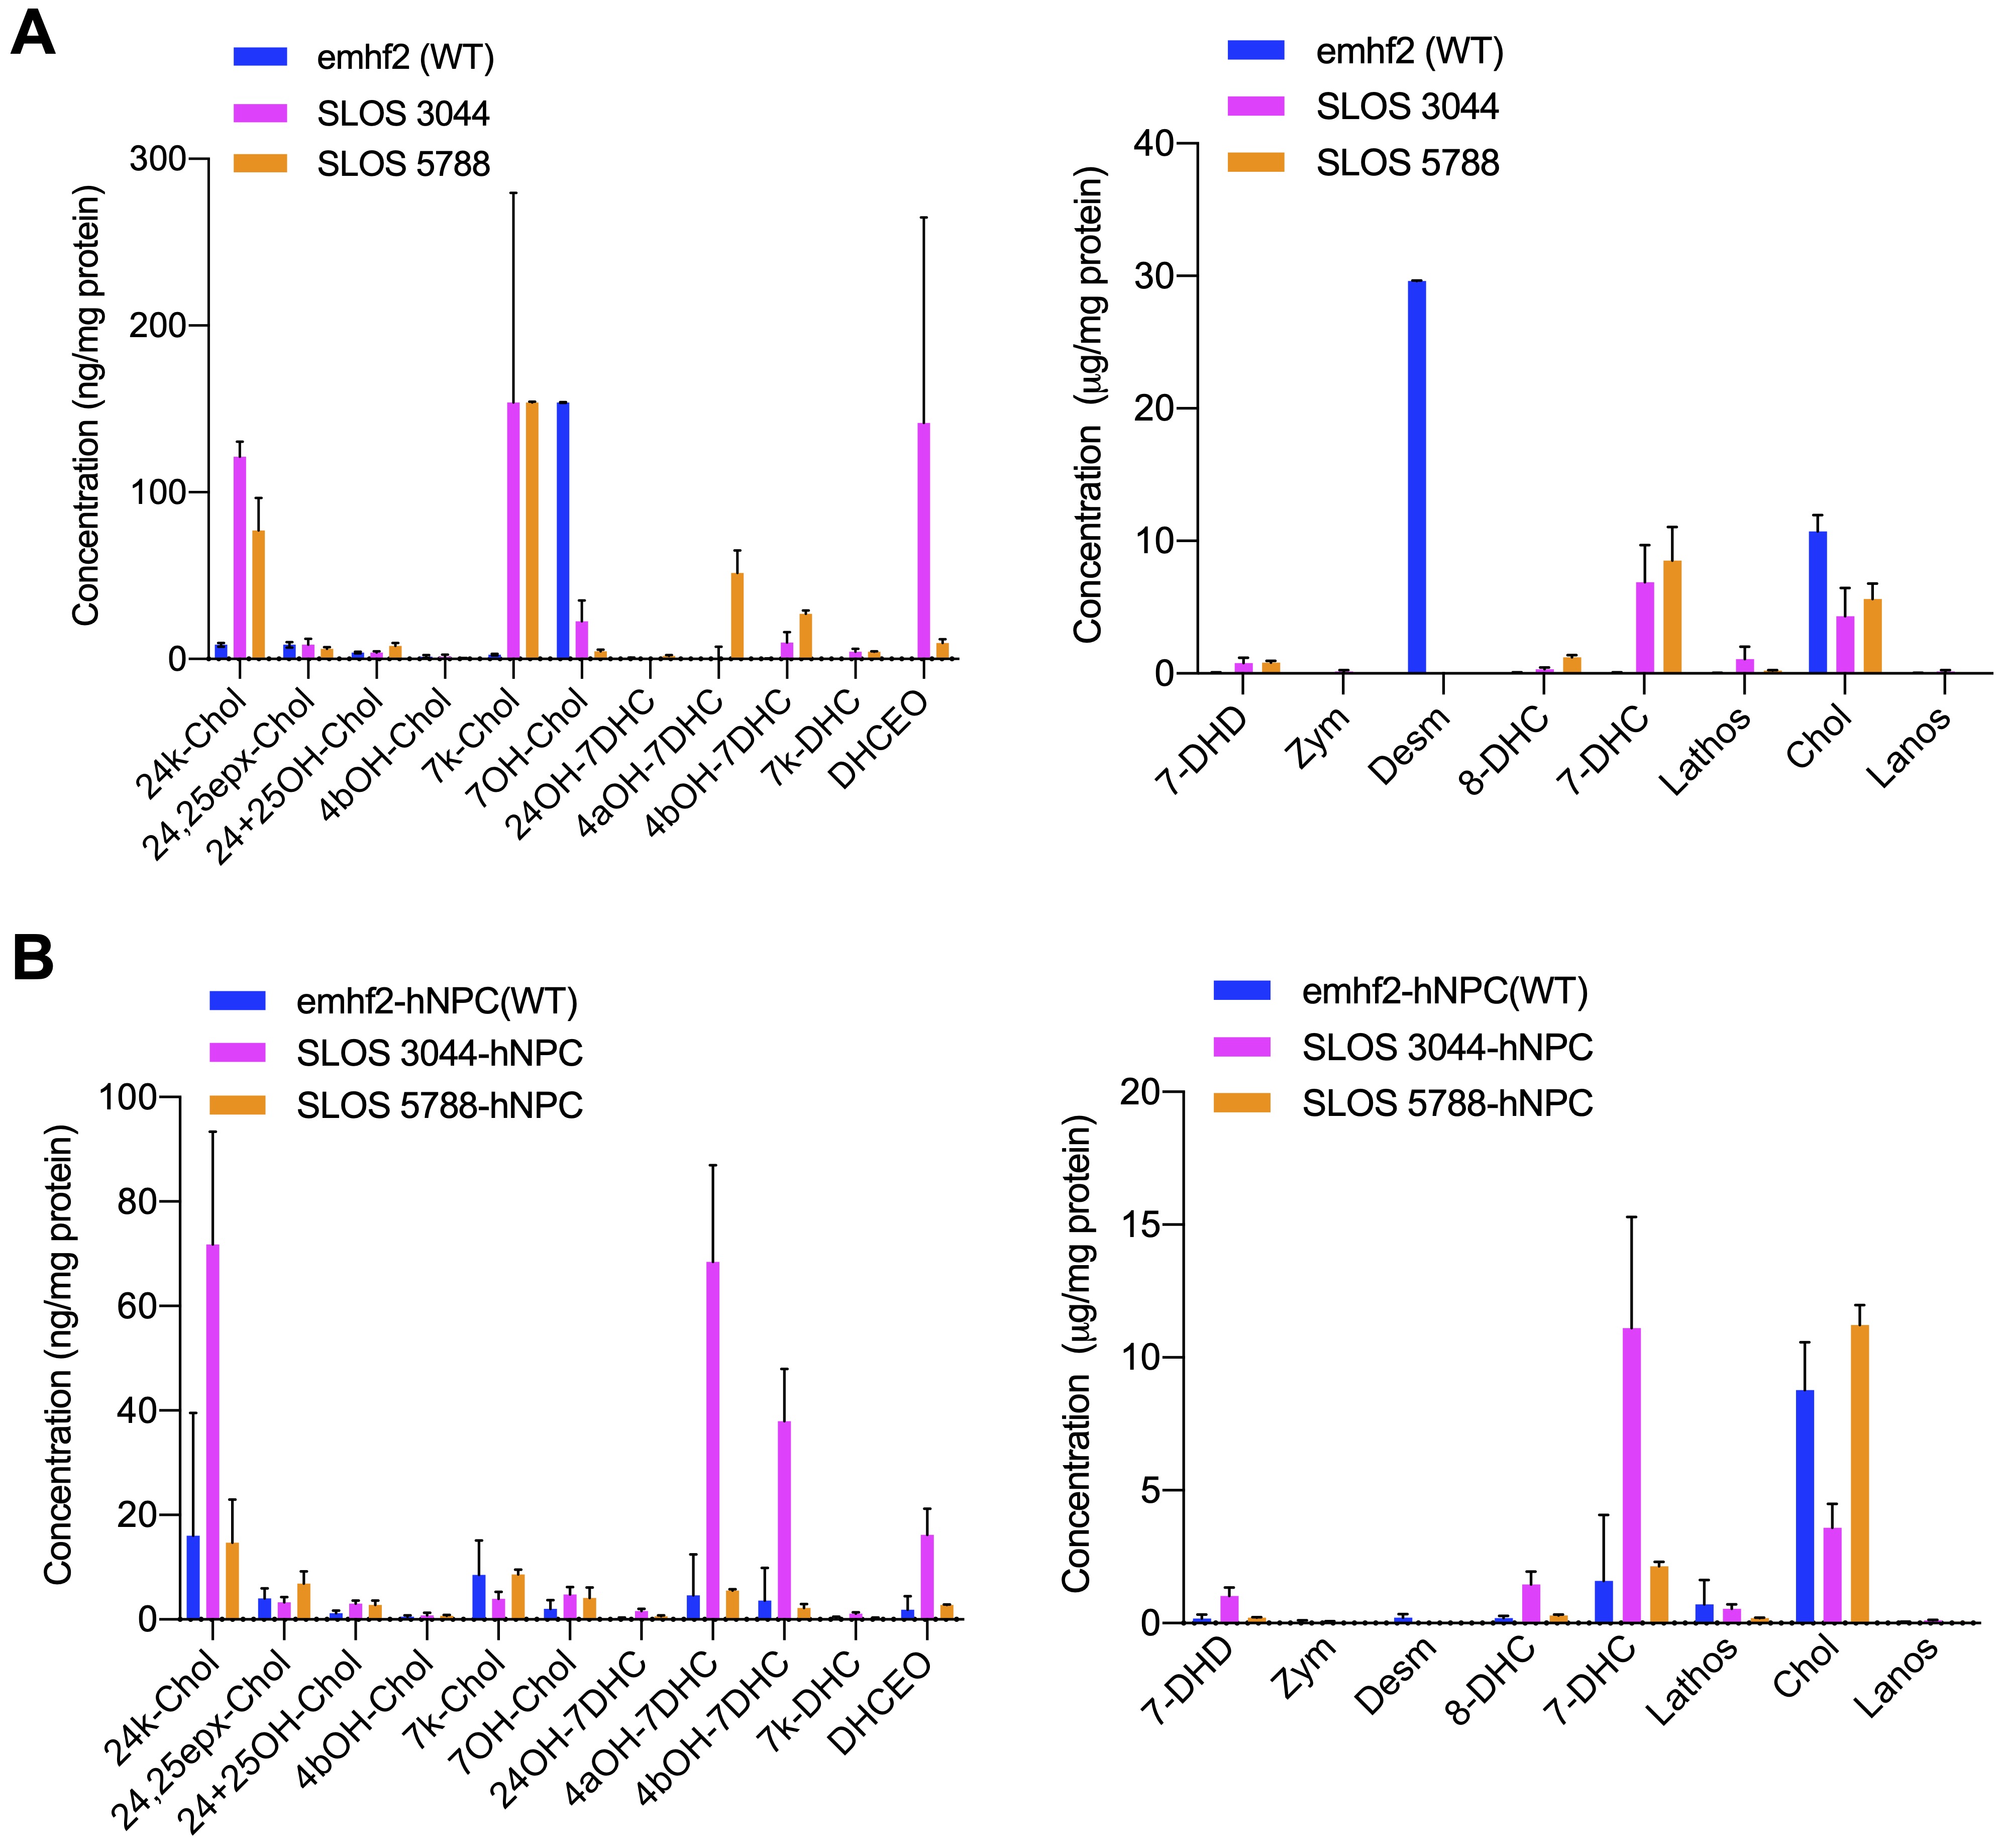

Supplement: supp [file elife-67141-supp-v1.zip › elife_poa_e67141_Figure_2_figure_supplement_2.jpg]

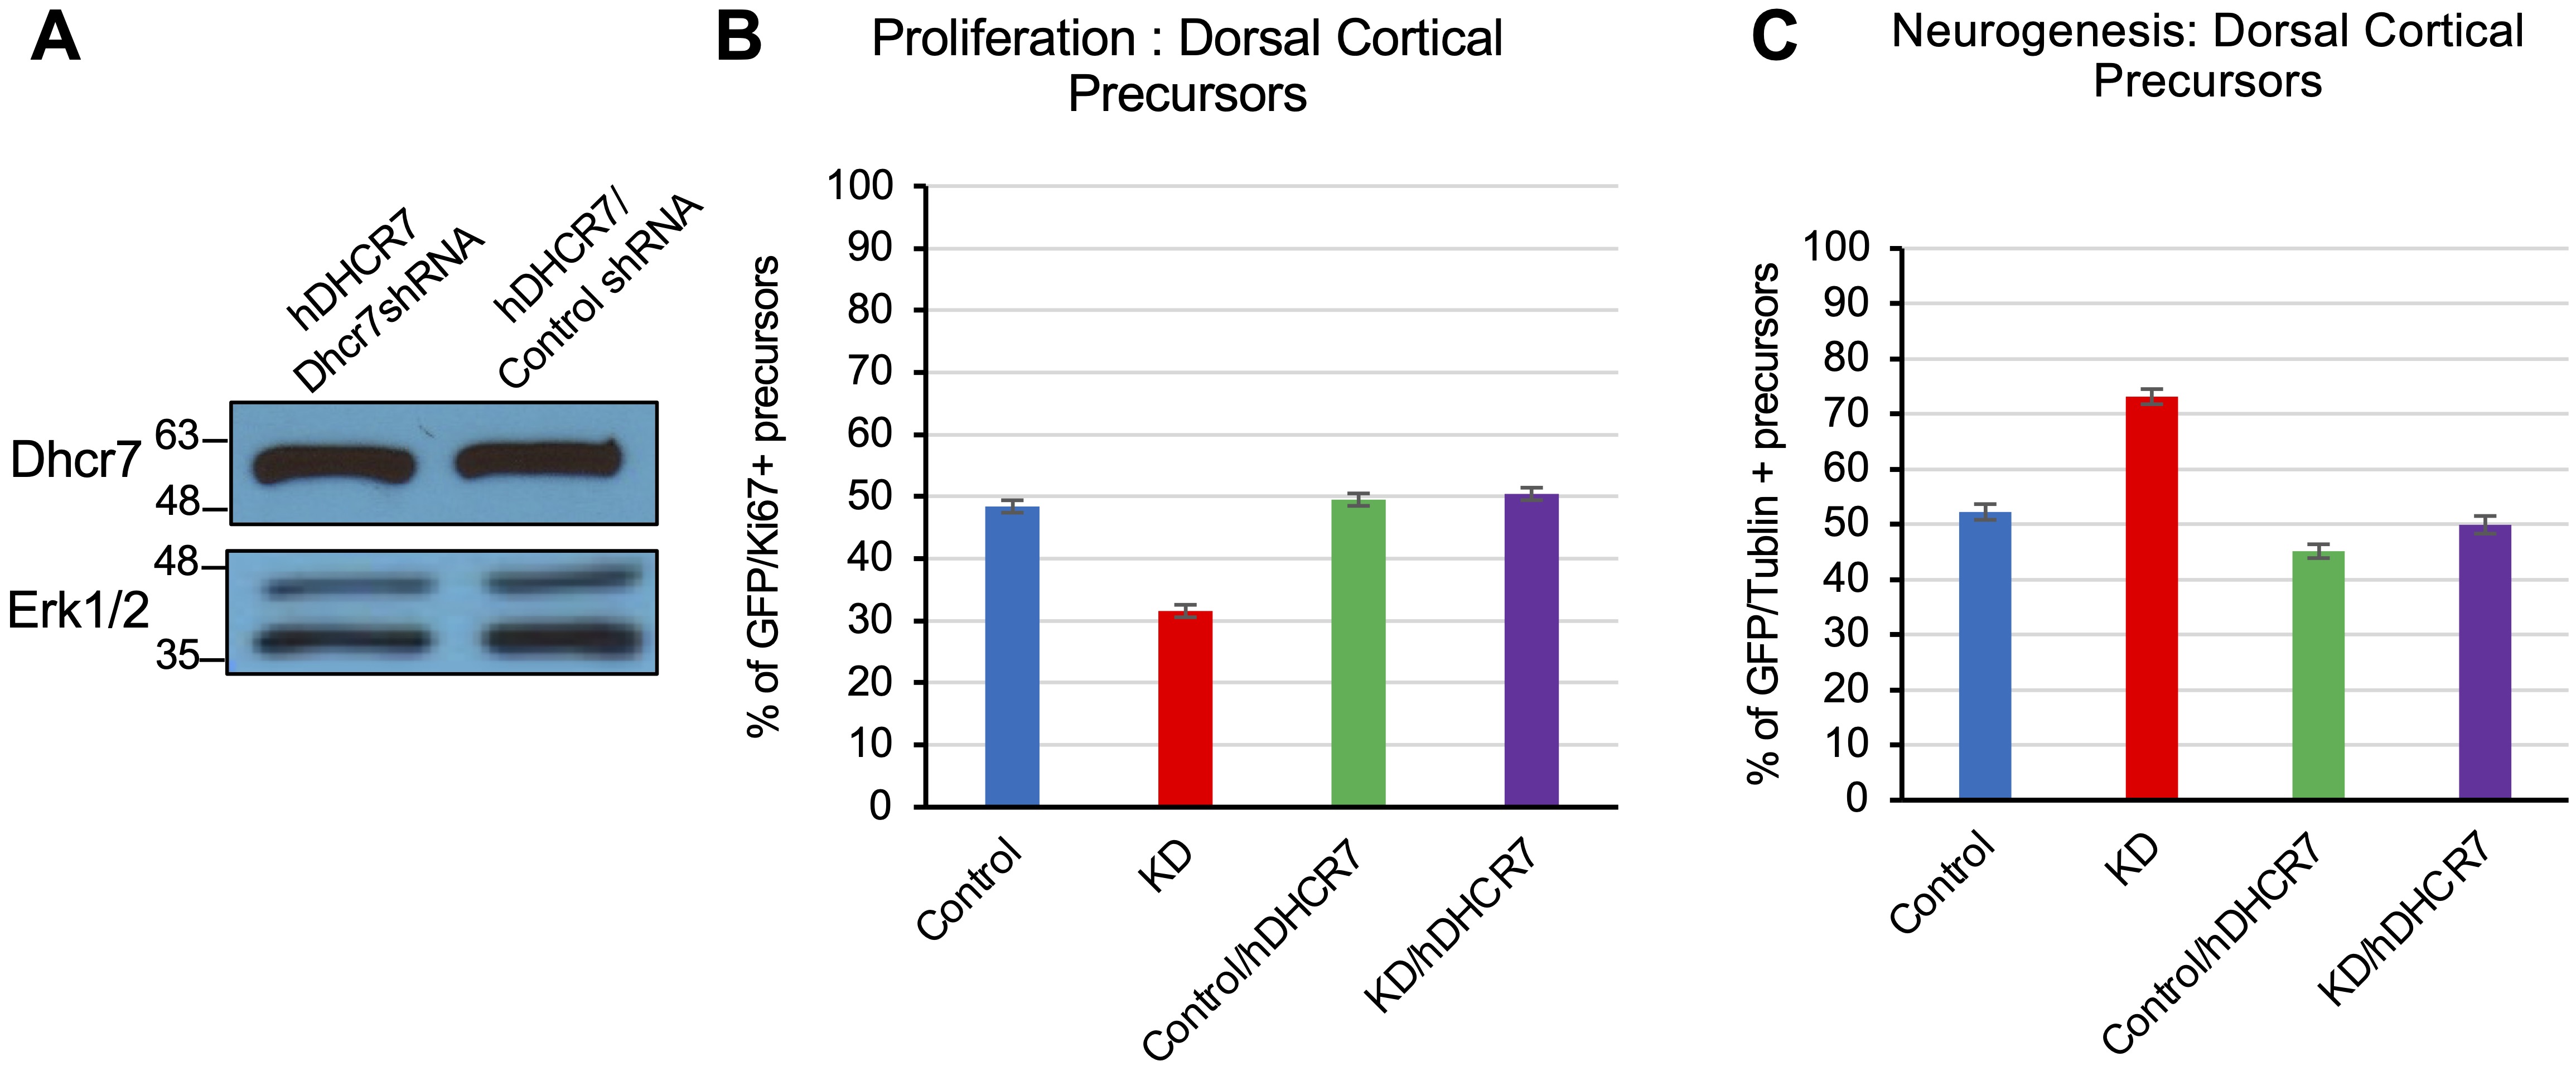

Supplement: supp [file elife-67141-supp-v1.zip › elife_poa_e67141_Figure_3_figure_supplement_1.jpg]

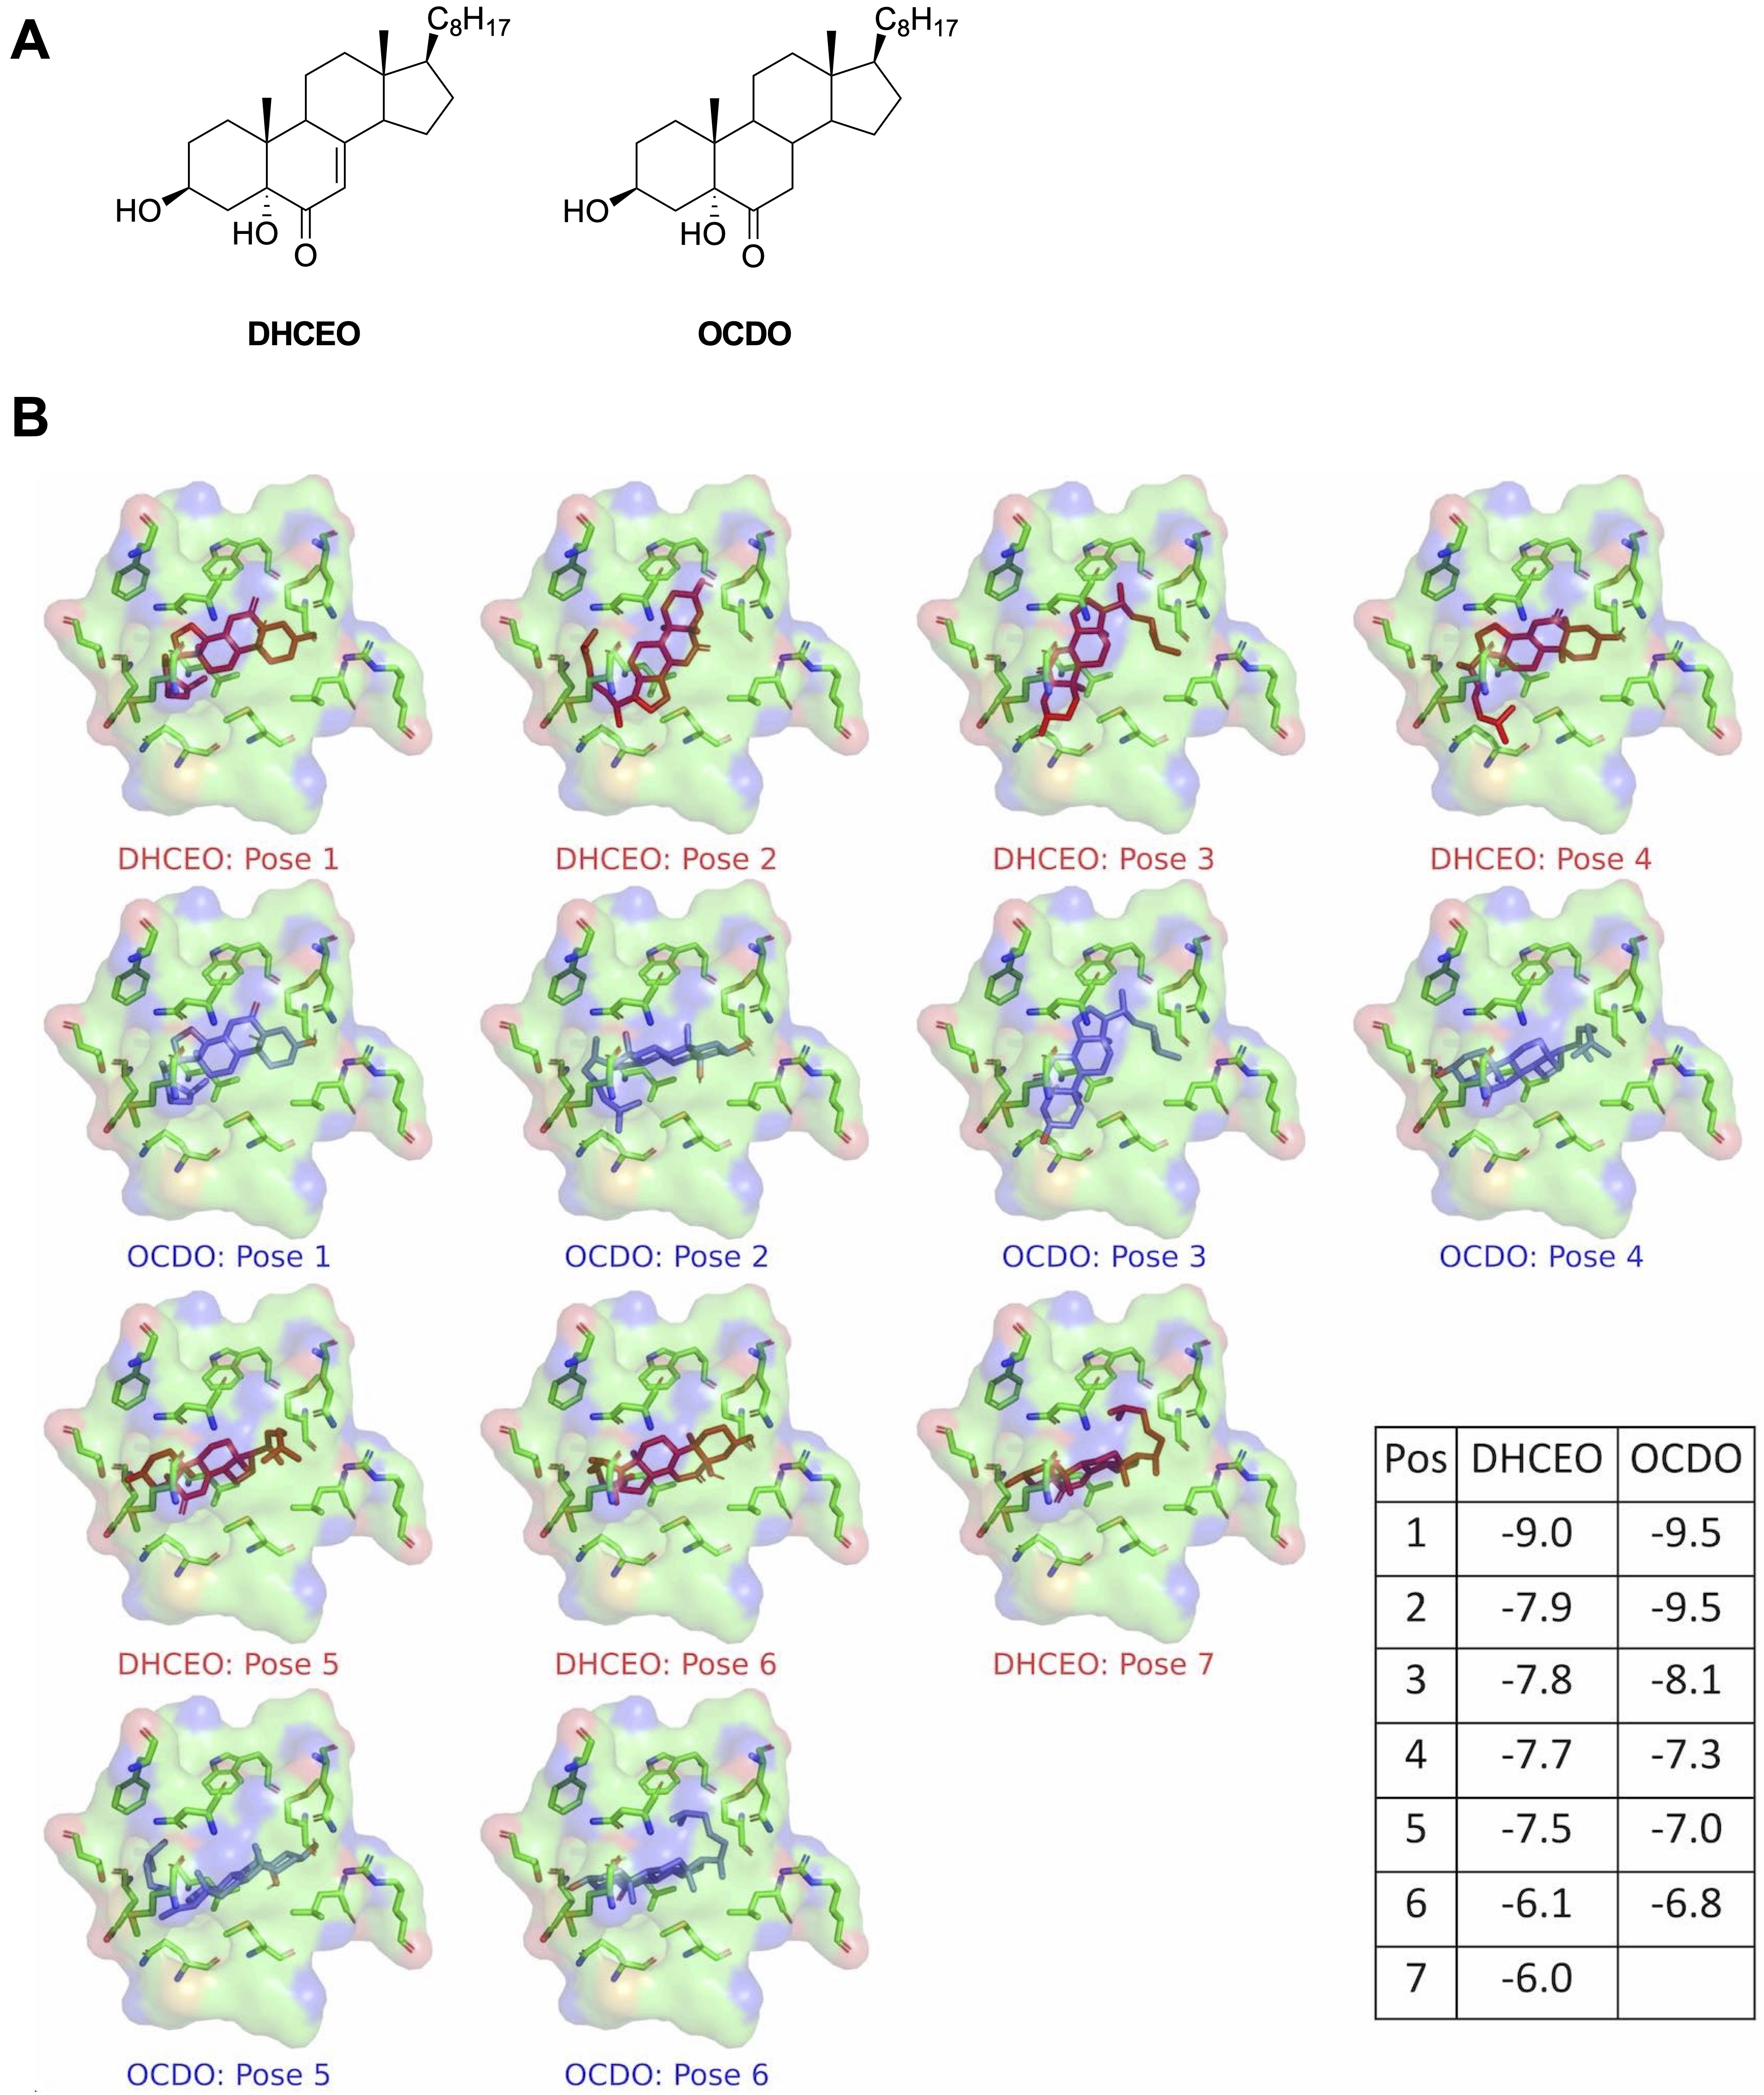

Supplement: supp [file elife-67141-supp-v1.zip › elife_poa_e67141_Figure_8_figure_supplement_1.jpg]

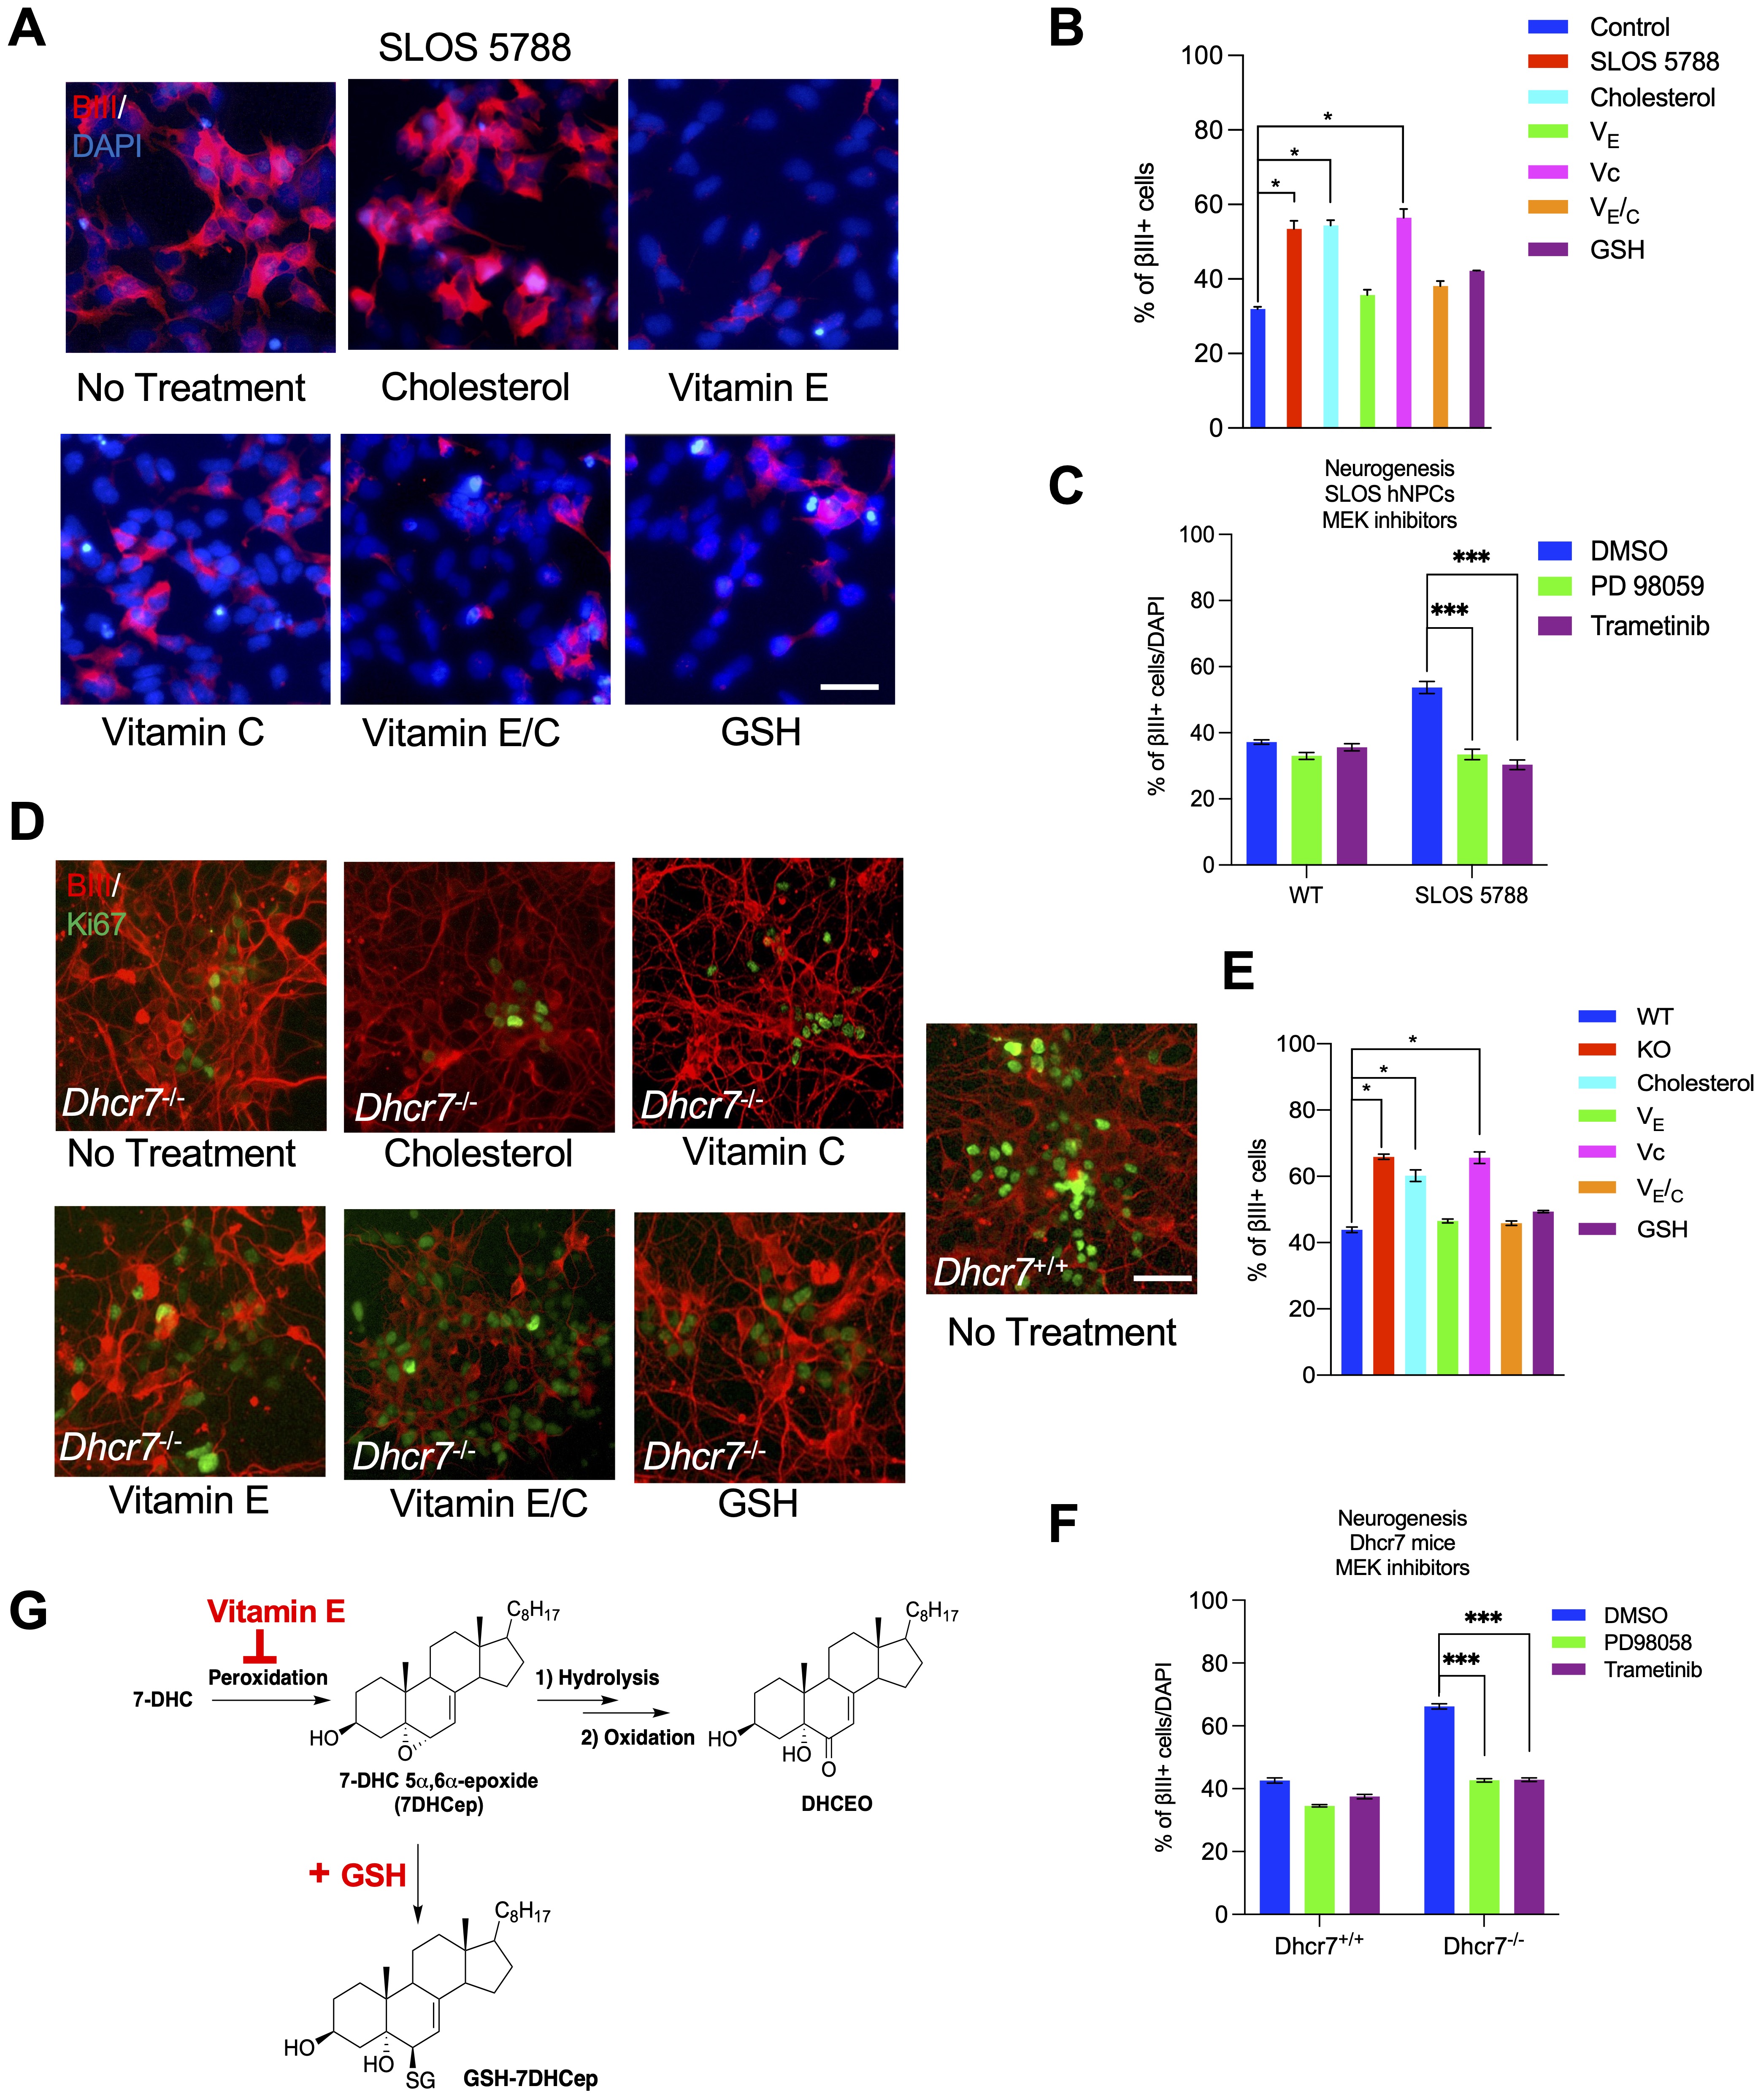

Supplement: supp [file elife-67141-supp-v1.zip › elife_poa_e67141_Figure_8_figure_supplement_2.jpg]

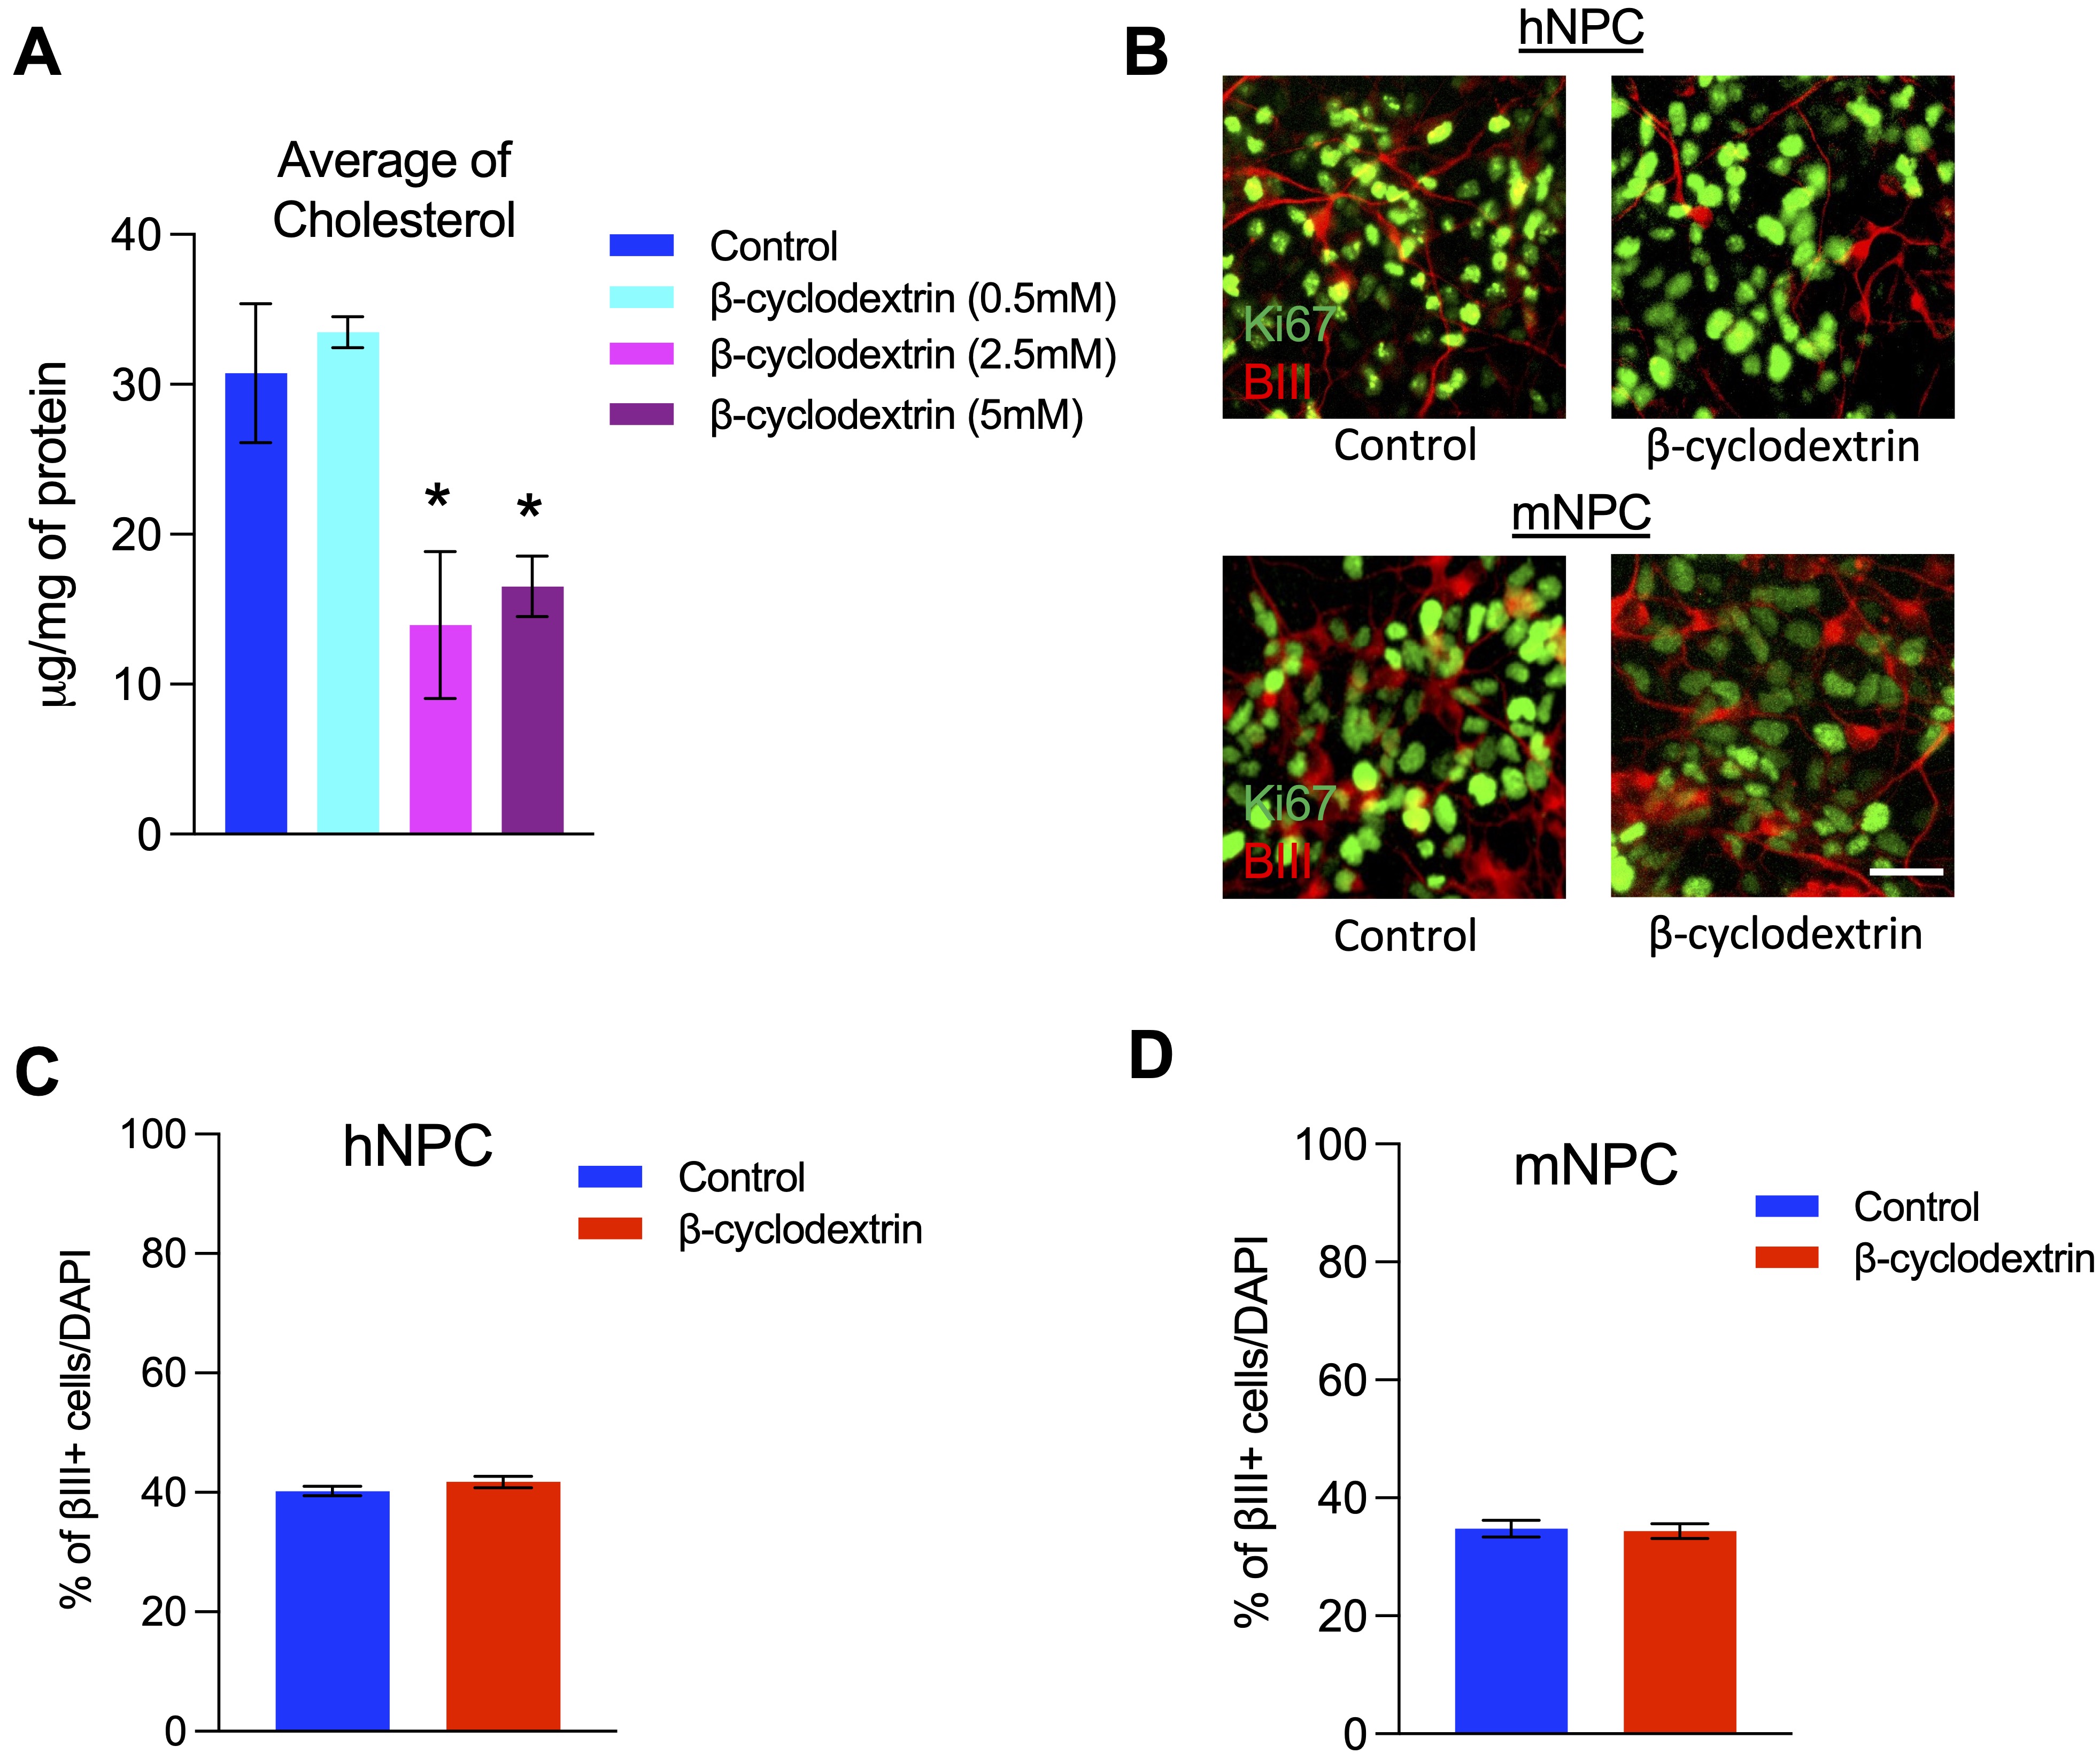

Supplement: supp [file elife-67141-supp-v1.zip › elife_poa_e67141_Figure_8_figure_supplement_3.jpg]

**E11.5 E13.5 E15.5 E17.5 P0**

**Dhcr7**

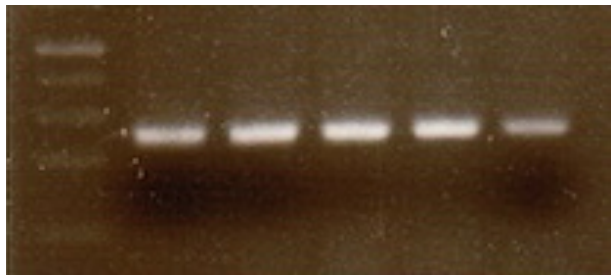

**Actin**

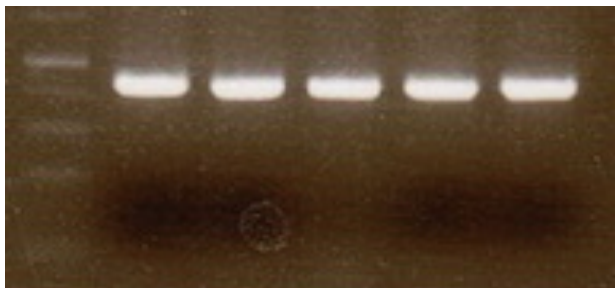

Supplement: supp [file elife-67141-supp-v1.zip › elife_poa_e67141_Figure_1_source_data_1.pdf]

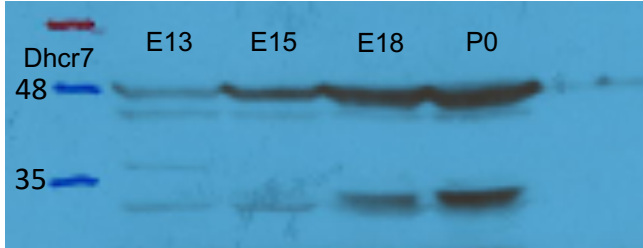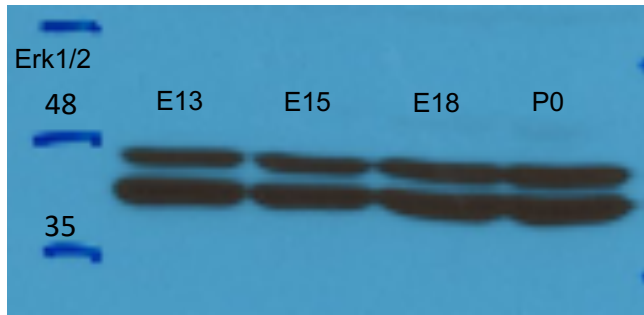

Supplement: supp [file elife-67141-supp-v1.zip › elife_poa_e67141_Figure_1_source_data_2.pdf]

mDhcr7  
KD

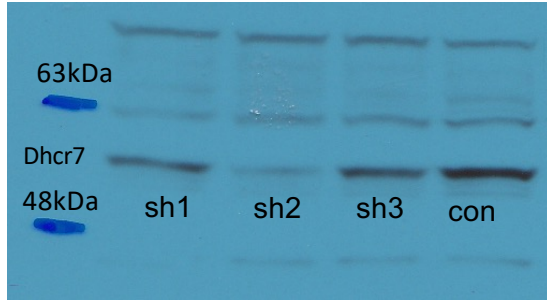

Erk1/2

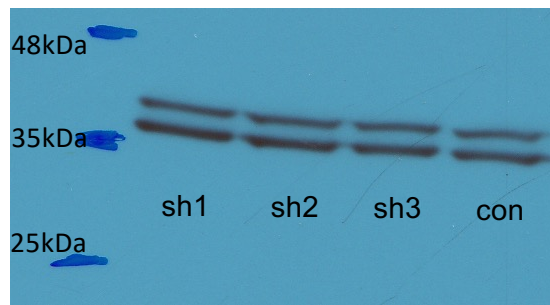

Supplement: supp [file elife-67141-supp-v1.zip › elife_poa_e67141_Figure_3_source_data_1.pdf]

hDHCR7  
KD

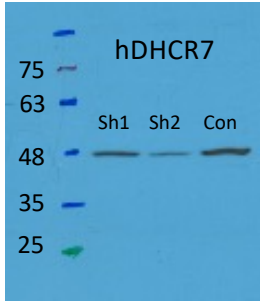

Erk1/2

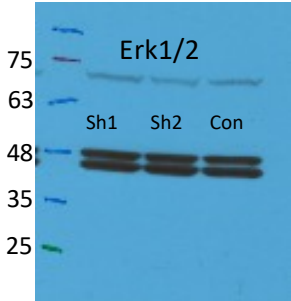

Supplement: supp [file elife-67141-supp-v1.zip › elife_poa_e67141_Figure_3_source_data_2.pdf]

*Dhcr7*  
E15.5 CTX

+/+ -/-

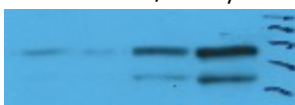

pTrkB

+/+ -/-

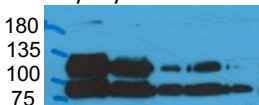

TrkB

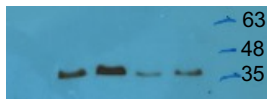

pMEK

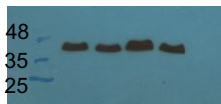

MEK

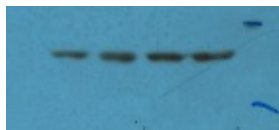

pC/EBP

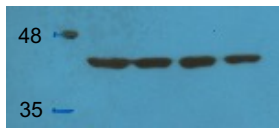

C/EBP

+/+ -/-

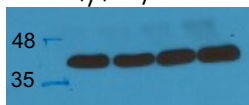

GAPDH

Supplement: supp [file elife-67141-supp-v1.zip › elife_poa_e67141_Figure_5_source_data_1.pdf]

*Dhcr7*  
E15.5 CTX

---

+/+

+/+

-/-

pGR

135

100

75

GR

135

100

GAPDH

48

35

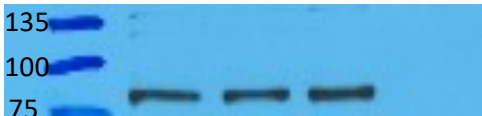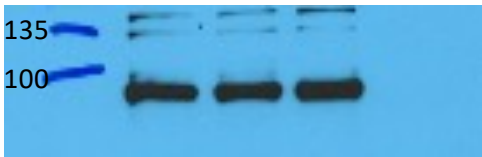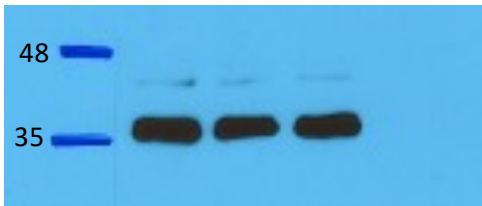

Supplement: supp [file elife-67141-supp-v1.zip › elife_poa_e67141_Figure_8_source_data_1.pdf]

DHCEO (hrs)

pGR

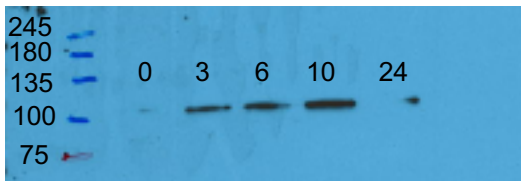

GR

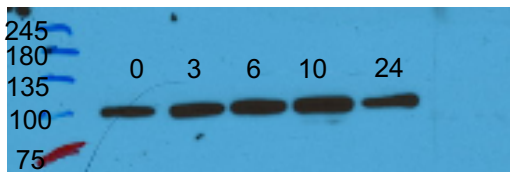

pTrkB

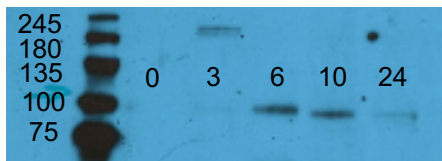

TrkB

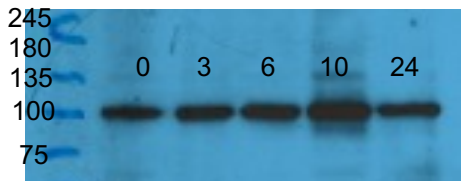

Erk1/2

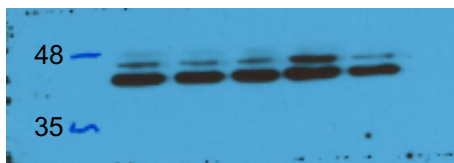

Supplement: supp [file elife-67141-supp-v1.zip › elife_poa_e67141_Figure_8_source_data_2.pdf]

PD98059

Trametinib

+

-

-

+

pMEK

48

35

25

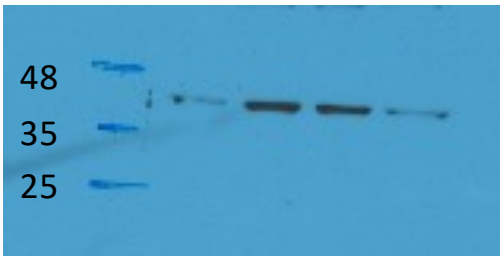

MEK

48

35

25

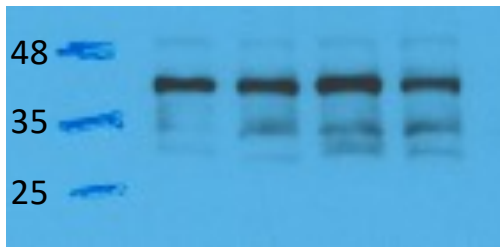

GAPDH

48

35

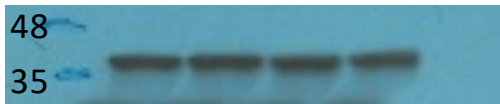

Supplement: supp [file elife-67141-supp-v1.zip › elife_poa_e67141_Figure_8_source_data_3.pdf]

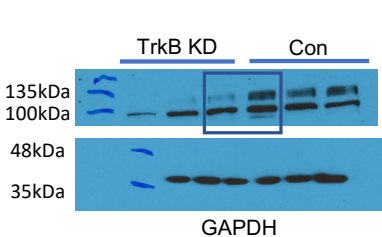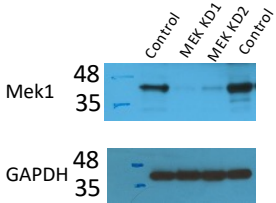

Supplement: supp [file elife-67141-supp-v1.zip › elife_poa_e67141_Figure_8_source_data_4.pdf]

WT

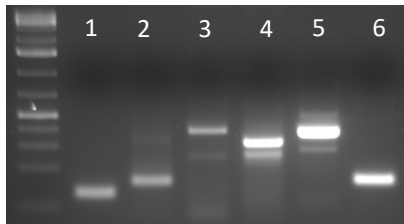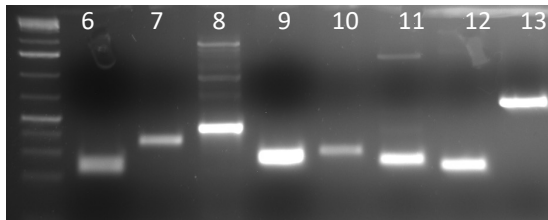

3044

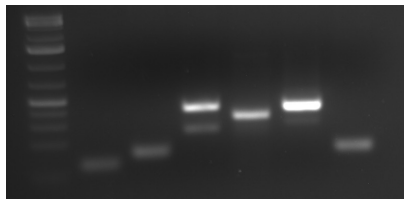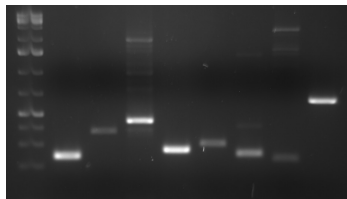

5788

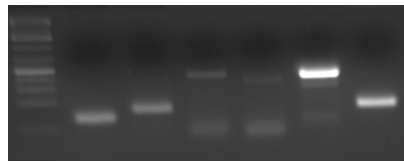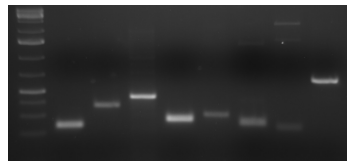

Supplement: supp [file elife-67141-supp-v1.zip › elife_poa_e67141_Figure_1_figure_supplement_1_source_data_1.pdf]
